# Supplementary material for: Solvent influences structural variation from a 3D 4-fold interpenetrated framework to a 2D layer-type porous coordination polymer: Structure analysis and highly selective gas adsorption properties
Source: Royal Society of Chemistry journal article supplement (doi:10.1039/c2ce06372g), 2012-01-01
Supplement: c2ce06372g.pdf [file c2ce06372g.pdf]

## Supporting information

### Solvent influence structural variation from 3D 4-fold interpenetrated framework to 2D layer-type porous coordination polymer: Structure analysis and highly selective gas adsorption properties

Bo Liu, Hui Miao, Ling-Yan Pang, Lei Hou, Yao-Yu Wang,\* and Qi-Zhen Shi

Key Laboratory of Synthetic and Natural Functional Molecule Chemistry of the Ministry of Education, Shaanxi Key Laboratory of Physico-Inorganic Chemistry, College of Chemistry & Materials Science, Northwest University, Xi'an 710069 (P. R. China).

Email: wyaoyu@nwu.edu.cn, Tel: 86 29 88302604

### Table of Content

1. **Fig. S1** The ball-and-stick drawing of the asymmetric unit in **1**, the hydrogen atoms and solvent molecules are omitted. Symmetry codes: A:  $x, -y, -1/2+z$ ; B:  $-x, -y, 1-z$ .
2. **Fig. S2** Schematic representation of the single 3D net a), and the 4-fold interpenetrated net b) of **1** (each  $\text{Co}^{2+}$  acts as a four-connecting node and each  $\text{dcp}^{2-}$  as a three-connecting node).
3. **Fig. S3** The ball-and-stick drawing of the asymmetric unit in **2**, the hydrogen atoms and solvent molecules are omitted. Symmetry codes: A:  $-1/2+x, 1/2-y, -1/2+z$ ; B:  $-x, y, 1/2-z$ .
4. **Fig. S4** View of the 2D layer of **2**: a) along the crystallographic  $a$ -axis; b) along the crystallographic  $b$ -axis; c) along the crystallographic (101)-axis.
5. **Fig. S5** View of the 2D stacked layers of **2**: a) along the crystallographic (100)-axis; b) along the crystallographic (010)-axis.
6. **Fig. S6**. TGA curves for **1** and **2** measured under nitrogen.
7. **Fig. S7** PXRD patterns of **1** simulated from the X-ray single-crystal structure and as-synthesized a), and **2** simulated from the X-ray single-crystal structure, as-synthesized, desolvated and resolvated samples b).
8. **Fig. S8** Differential pore volume as a function of pore width calculated from the adsorption isotherm of Ar at 87 K using the Horvath-Kawazoe model, median pore width of 4.95 Å.
9. **Fig. S9** Isothermic heat of adsorption for  $\text{CO}_2$  at different  $\text{CO}_2$  loadings in **2**.
10. **Fig. S10** PXRD patterns for complexes **2, 2a, 2b, 2c and 2d**.
11. **Table S1**. Crystal data and structure refinements for **1, 2, 2a, 2b, 2c and 2d**.

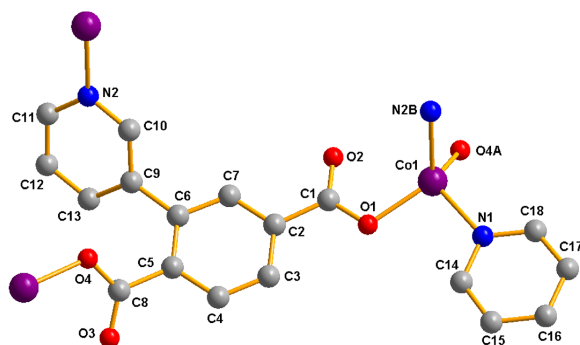

**Fig. S1** The ball-and-stick drawing of the asymmetric unit in **1**, the hydrogen atoms and solvent molecules are omitted. Symmetry codes: A:  $x, -y, -1/2+z$ ; B:  $-x, -y, 1-z$ .

a)

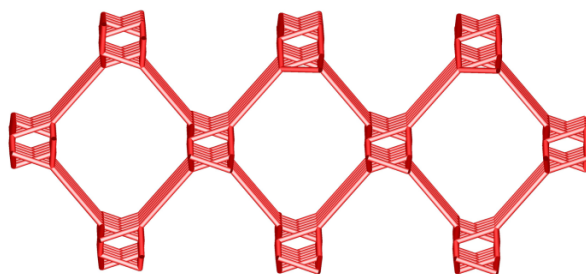

b)

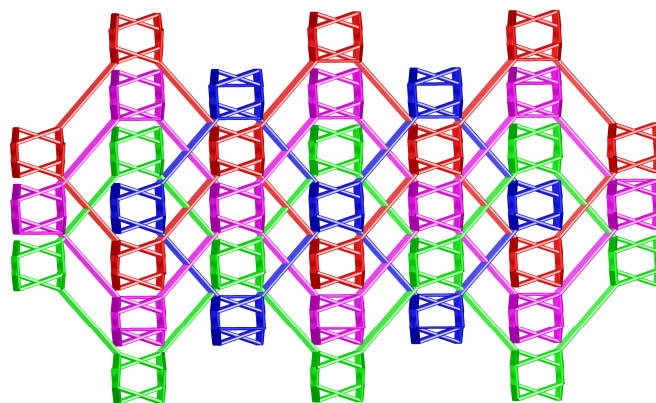

**Fig. S2** Schematic representation of the single 3D net a), and the 4-fold interpenetrated net b) of **1** (each  $\text{Co}^{2+}$  acts as a four-connecting node and each  $\text{dcp}^{2-}$  as a three-connecting node).



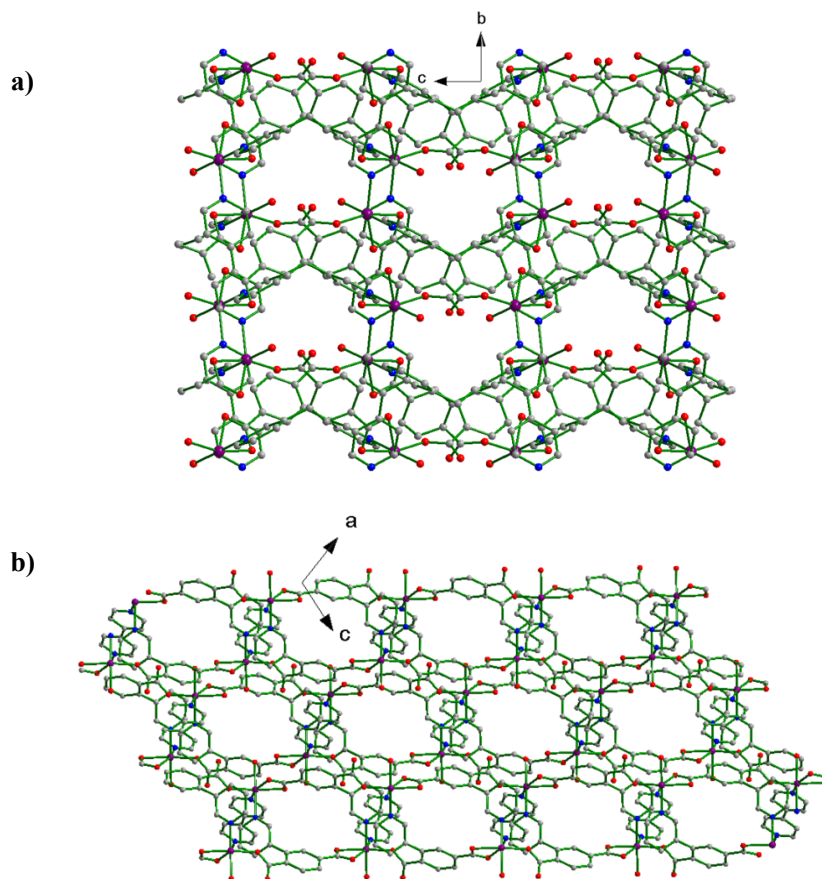

**Fig. S5** View of the 2D stacked layers of **2**: a) along the crystallographic (100)-axis; b) along the crystallographic (010)-axis.

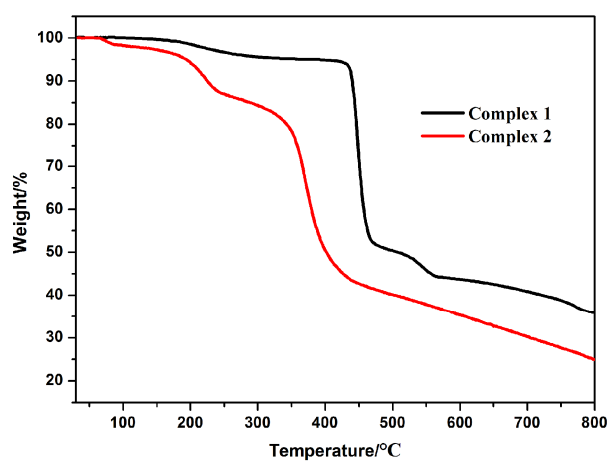

**Fig. S6.** TGA curves for **1** and **2** measured under nitrogen.

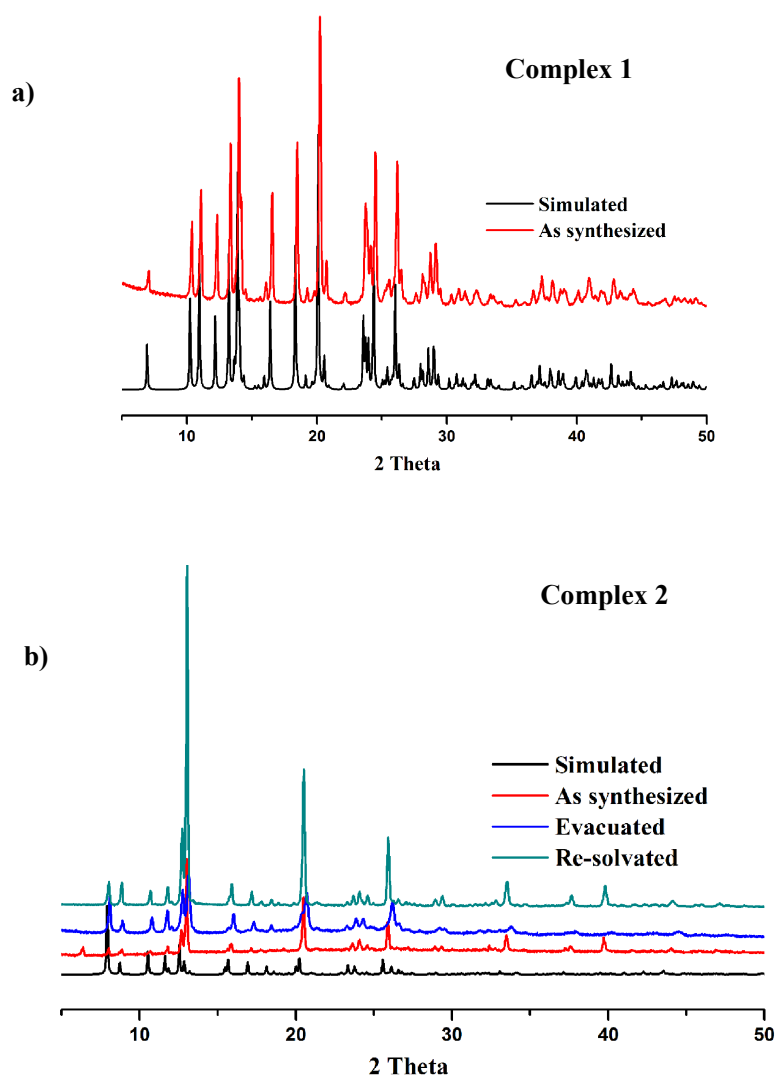

**Fig. S7** PXRD patterns of **1** simulated from the X-ray single-crystal structure and as-synthesized a), and **2** simulated from the X-ray single-crystal structure, as-synthesized, desolvated and resolvated samples b).

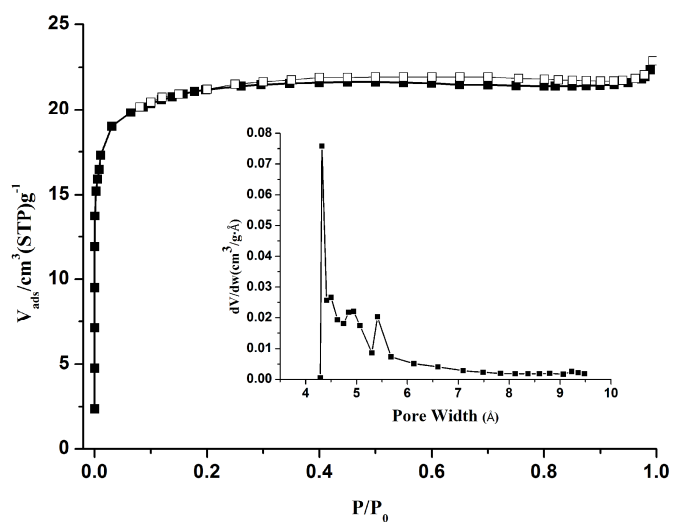

**Fig. S8** Differential pore volume as a function of pore width calculated from the adsorption isotherm of Ar at 87 K using the Horvath-Kawazoe model, median pore width of 4.95  $\text{\AA}$ .

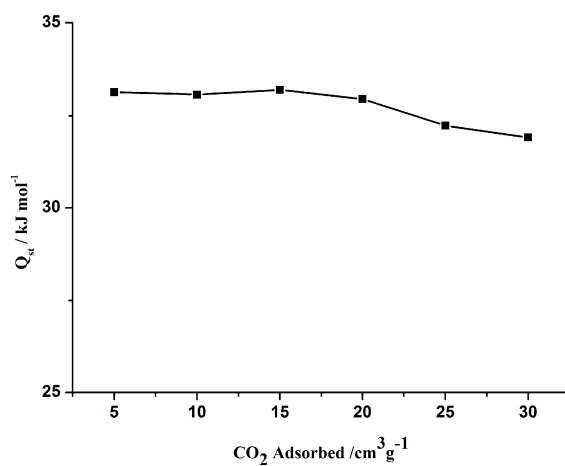

**Fig. S9** Isothermic heat of adsorption for  $\text{CO}_2$  at different  $\text{CO}_2$  loadings in **2**.

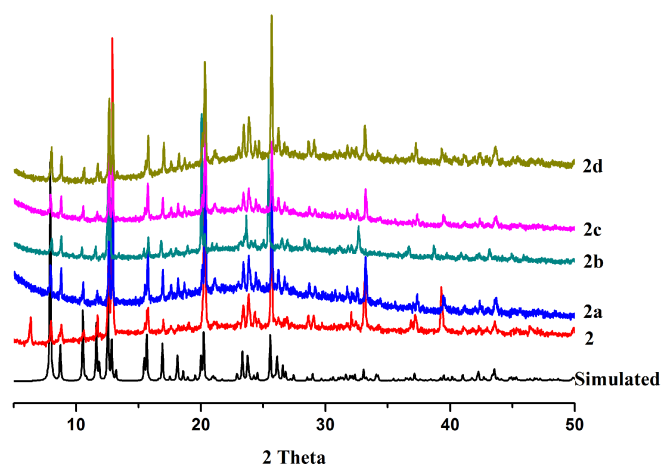

**Fig. S10** PXRD patterns for complexes **2**, **2a**, **2b**, **2c** and **2d**.

**Table S1.** Crystal data and structure refinements for **1**, **2**, **2a**, **2b**, **2c** and **2d**.

| Complex No.                                      | <b>1</b>                                                        | <b>2</b>                                                        | <b>2a</b>                                                       | <b>2b</b>                                                       |
|--------------------------------------------------|-----------------------------------------------------------------|-----------------------------------------------------------------|-----------------------------------------------------------------|-----------------------------------------------------------------|
| Empirical formula                                | C <sub>18</sub> H <sub>13</sub> N <sub>2</sub> CoO <sub>5</sub> | C <sub>18</sub> H <sub>17</sub> N <sub>2</sub> CoO <sub>7</sub> | C <sub>18</sub> H <sub>17</sub> N <sub>2</sub> CoO <sub>7</sub> | C <sub>18</sub> H <sub>17</sub> N <sub>2</sub> CoO <sub>7</sub> |
| Formula mass                                     | 396.22                                                          | 432.23                                                          | 432.23                                                          | 432.23                                                          |
| Temperature [K]                                  | 296(2)                                                          | 296(2)                                                          | 296(2)                                                          | 296(2)                                                          |
| Crystal system                                   | monoclinic                                                      | monoclinic                                                      | monoclinic                                                      | monoclinic                                                      |
| Space group                                      | <i>P2/c</i>                                                     | <i>C2/c</i>                                                     | <i>C2/c</i>                                                     | <i>C2/c</i>                                                     |
| <i>a</i> [Å]                                     | 13.1622(15)                                                     | 17.795(2)                                                       | 17.777(3)                                                       | 17.877(4)                                                       |
| <i>b</i> [Å]                                     | 7.2427(8)                                                       | 14.8776(19)                                                     | 14.926(3)                                                       | 14.730(3)                                                       |
| <i>c</i> [Å]                                     | 17.7408(19)                                                     | 16.052(2)                                                       | 16.131(3)                                                       | 16.583(3)                                                       |
| $\beta$ [°]                                      | 103.584(2)                                                      | 109.140(2)                                                      | 109.324(3)                                                      | 109.764(4)                                                      |
| <i>V</i> [Å <sup>3</sup> ]                       | 1643.9(3)                                                       | 4014.8(8)                                                       | 4039.1(13)                                                      | 4109.5(14)                                                      |
| <i>Z</i>                                         | 4                                                               | 8                                                               | 8                                                               | 8                                                               |
| <i>D</i> <sub>calcd.</sub> [g·cm <sup>-3</sup> ] | 1.593                                                           | 1.417                                                           | 1.408                                                           | 1.384                                                           |
| $\mu$ [mm <sup>-1</sup> ]                        | 1.077                                                           | 0.895                                                           | 0.890                                                           | 0.874                                                           |
| GOF on <i>F</i> <sup>2</sup>                     | 1.044                                                           | 1.088                                                           | 1.053                                                           | 1.054                                                           |
| reflns collected/<br>unique                      | 8007/2928                                                       | 10042/3578                                                      | 11741/4603                                                      | 10135/3660                                                      |
| <i>R</i> <sub>int</sub>                          | 0.0297                                                          | 0.0499                                                          | 0.0907                                                          | 0.0756                                                          |
| Final <i>R</i> <sup>[a]</sup>                    | <i>R</i> <sub>1</sub> = 0.0353                                  | <i>R</i> <sub>1</sub> = 0.0611                                  | <i>R</i> <sub>1</sub> = 0.0775                                  | <i>R</i> <sub>1</sub> = 0.0793                                  |
| indices [ <i>I</i> > 2 $\sigma$ ( <i>I</i> )]    | <i>wR</i> <sub>2</sub> = 0.0901                                 | <i>wR</i> <sub>2</sub> = 0.1845                                 | <i>wR</i> <sub>2</sub> = 0.1996                                 | <i>wR</i> <sub>2</sub> = 0.2039                                 |

| Complex No.                                      | <b>2c</b>                                                                      | <b>2d</b>                                                                      |
|--------------------------------------------------|--------------------------------------------------------------------------------|--------------------------------------------------------------------------------|
| Empirical formula                                | C <sub>36</sub> H <sub>32</sub> CO <sub>2</sub> N <sub>4</sub> O <sub>13</sub> | C <sub>36</sub> H <sub>32</sub> CO <sub>2</sub> N <sub>4</sub> O <sub>13</sub> |
| Formula mass                                     | 846.47                                                                         | 846.47                                                                         |
| Temperature [K]                                  | 296(2)                                                                         | 296(2)                                                                         |
| Crystal system                                   | monoclinic                                                                     | monoclinic                                                                     |
| Space group                                      | <i>C2/c</i>                                                                    | <i>C2/c</i>                                                                    |
| <i>a</i> [Å]                                     | 17.7715(12)                                                                    | 17.547(10)                                                                     |
| <i>b</i> [Å]                                     | 14.9149(10)                                                                    | 14.908(9)                                                                      |
| <i>c</i> [Å]                                     | 16.1199(11)                                                                    | 16.176(10)                                                                     |
| $\beta$ [°]                                      | 109.3020                                                                       | 108.365(9)                                                                     |
| <i>V</i> [Å <sup>3</sup> ]                       | 4032.6(5)                                                                      | 4016(4)                                                                        |
| <i>Z</i>                                         | 4                                                                              | 4                                                                              |
| <i>D</i> <sub>calcd.</sub> [g·cm <sup>-3</sup> ] | 1.384                                                                          | 1.390                                                                          |
| $\mu$ [mm <sup>-1</sup> ]                        | 0.888                                                                          | 0.892                                                                          |
| GOF on <i>F</i> <sup>2</sup>                     | 1.001                                                                          | 1.006                                                                          |
| reflns collected/<br>unique                      | 11146/3526                                                                     | 8601/3560                                                                      |
| <i>R</i> <sub>int</sub>                          | 0.0296                                                                         | 0.0751                                                                         |
| Final <i>R</i> <sup>[a]</sup>                    | <i>R</i> <sub>1</sub> = 0.0656                                                 | <i>R</i> <sub>1</sub> = 0.0826                                                 |
| indices [ <i>I</i> >2 $\sigma$ ( <i>I</i> )]     | <i>wR</i> <sub>2</sub> = 0.1906                                                | <i>wR</i> <sub>2</sub> = 0.2110                                                |

<sup>a</sup>  $R_1 = \sum ||F_o| - |F_c|| / \sum |F_o|$ ,  $wR_2 = [\sum w(F_o^2 - F_c^2)^2 / \sum w(F_o^2)^2]^{1/2}$
